# Supplementary material
Source: PubMed Central journal article supplement (PMC3280136)
Supplement: ismej2011125x2.pdf [file ismej2011125x2.pdf]

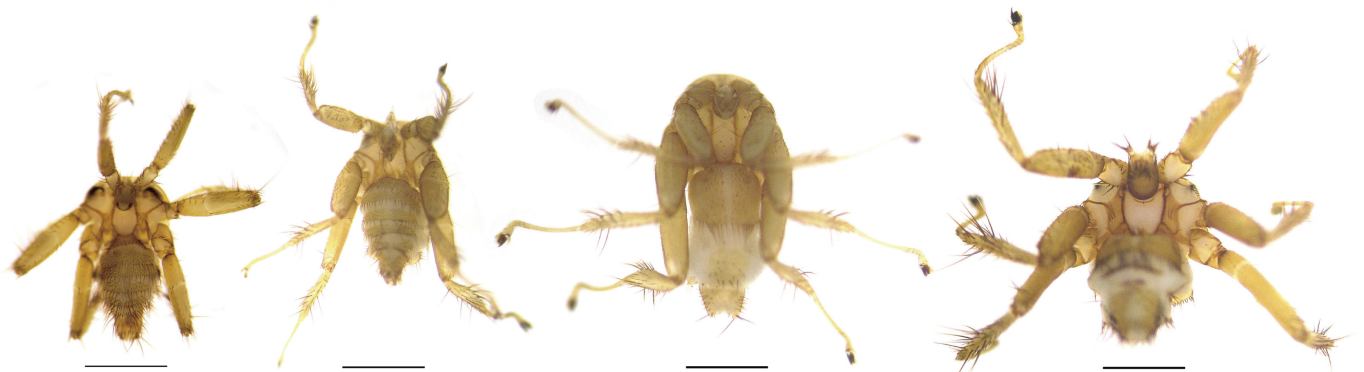

*Basilia rybini*  
male

*Basilia truncata*  
male

*Phthiridium hindlei*  
female

*Penicillidia jenynsii*  
female

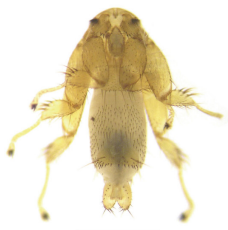

*Nycteribia allotopa*  
female

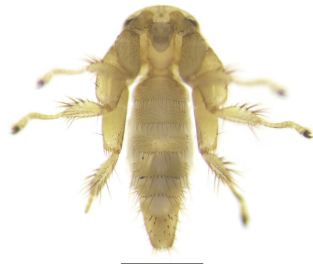

*Nycteribia pleuralis*  
male

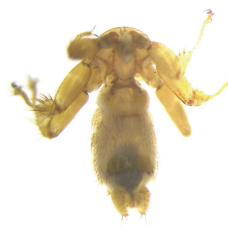

*Nycteribia pygmaea*  
female

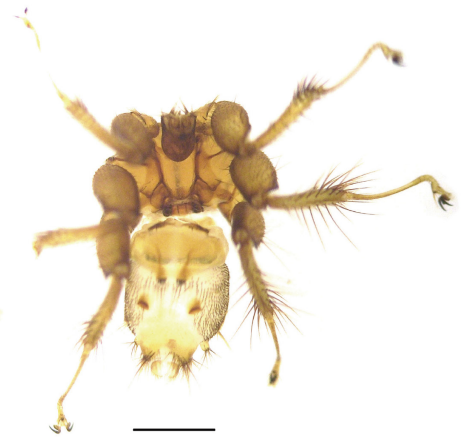

*Penicillidia monoceros*  
female
