# Supplementary material
Source: PubMed Central journal article supplement (PMC3280136)

0.01

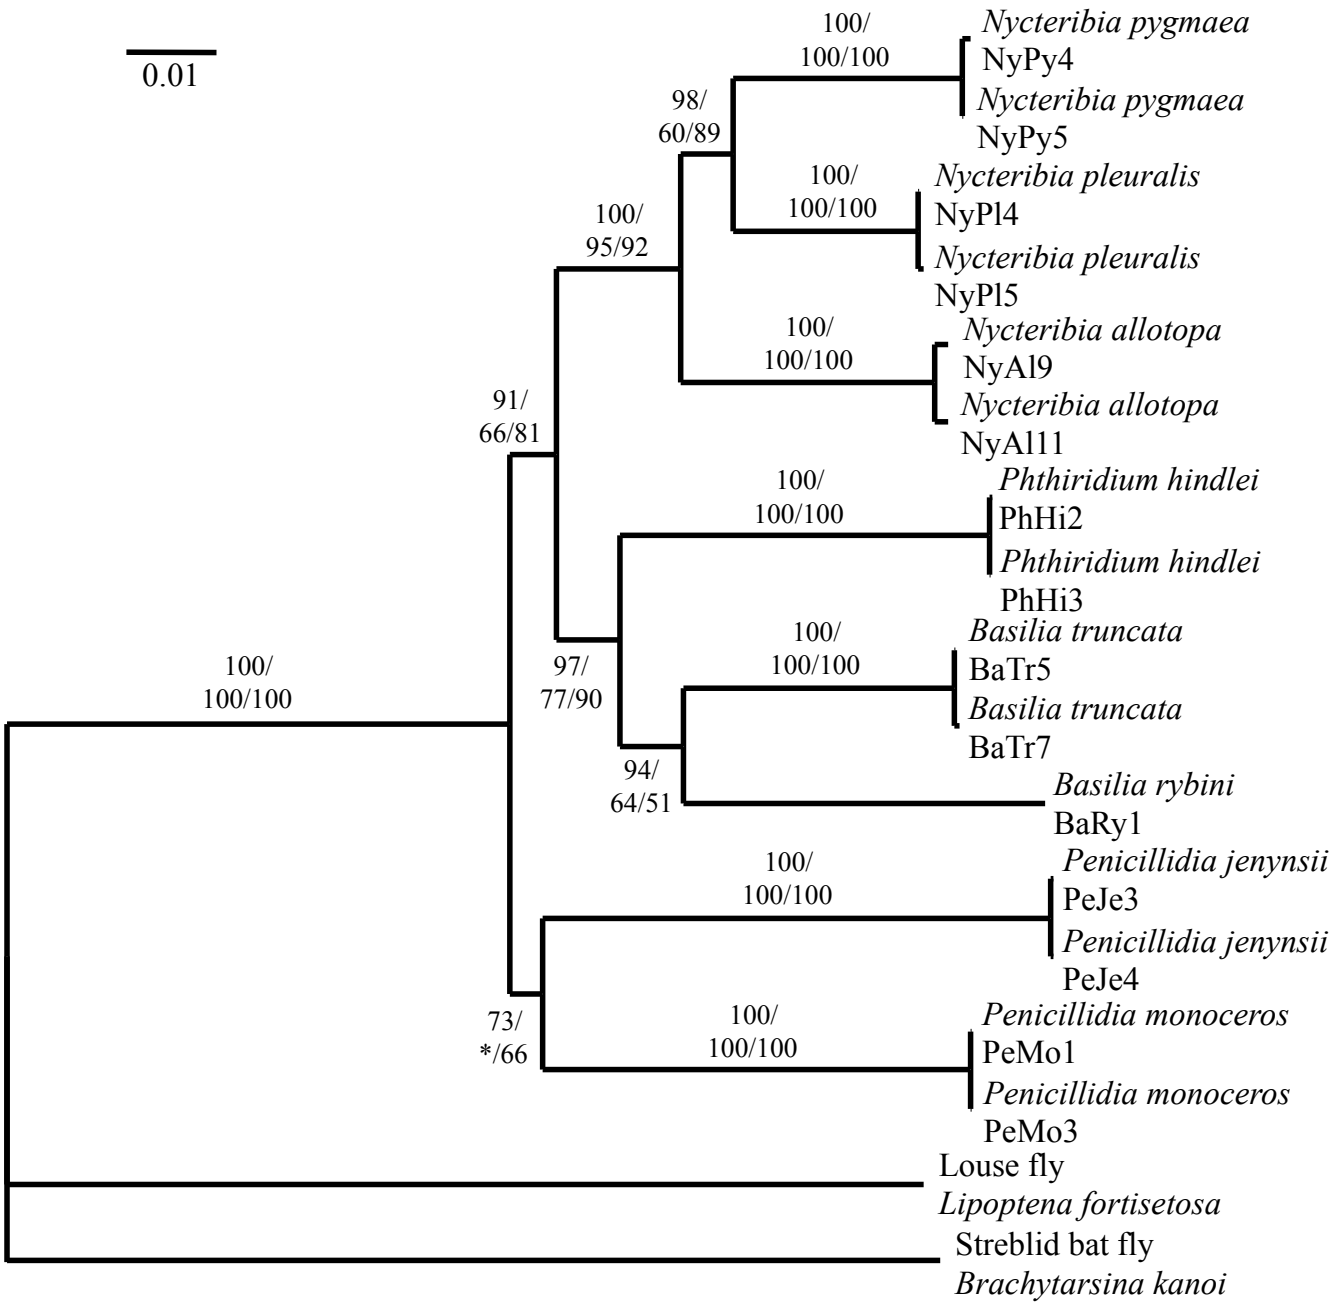

Supplementary Figure S9

Supplement: ismej2011125x10.pdf [file ismej2011125x10.pdf]

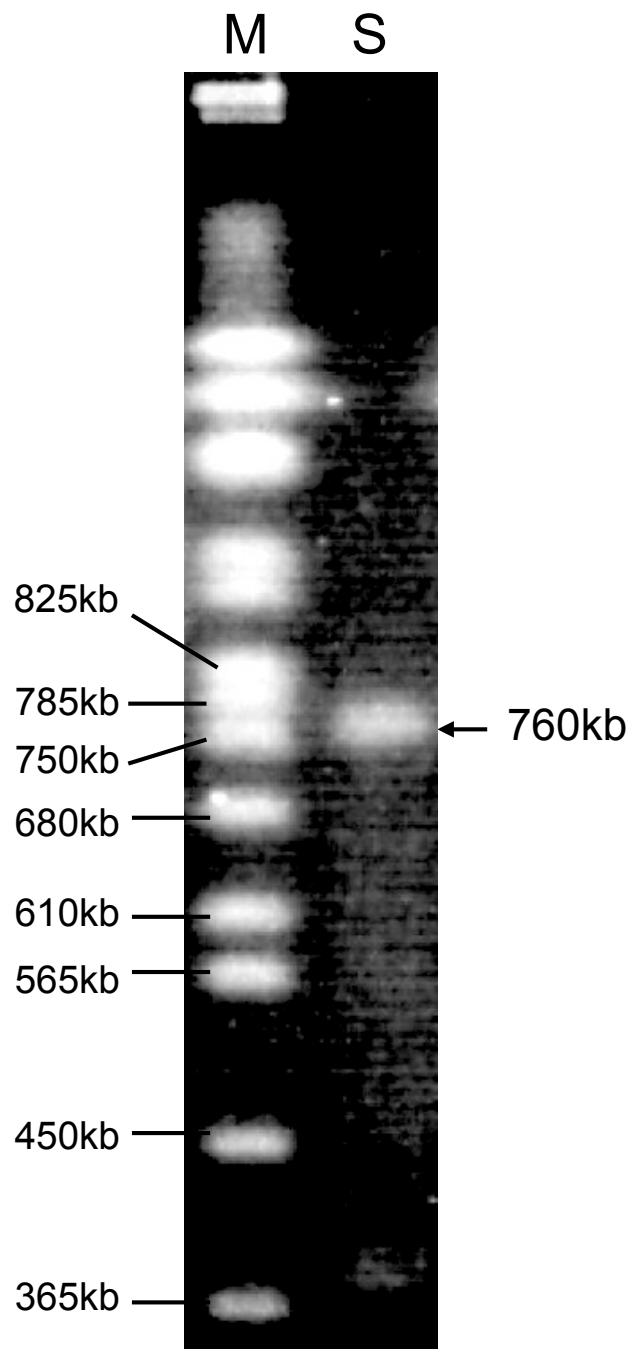

**Supplementary Figure S10**

Supplement: ismej2011125x11.pdf [file ismej2011125x11.pdf]

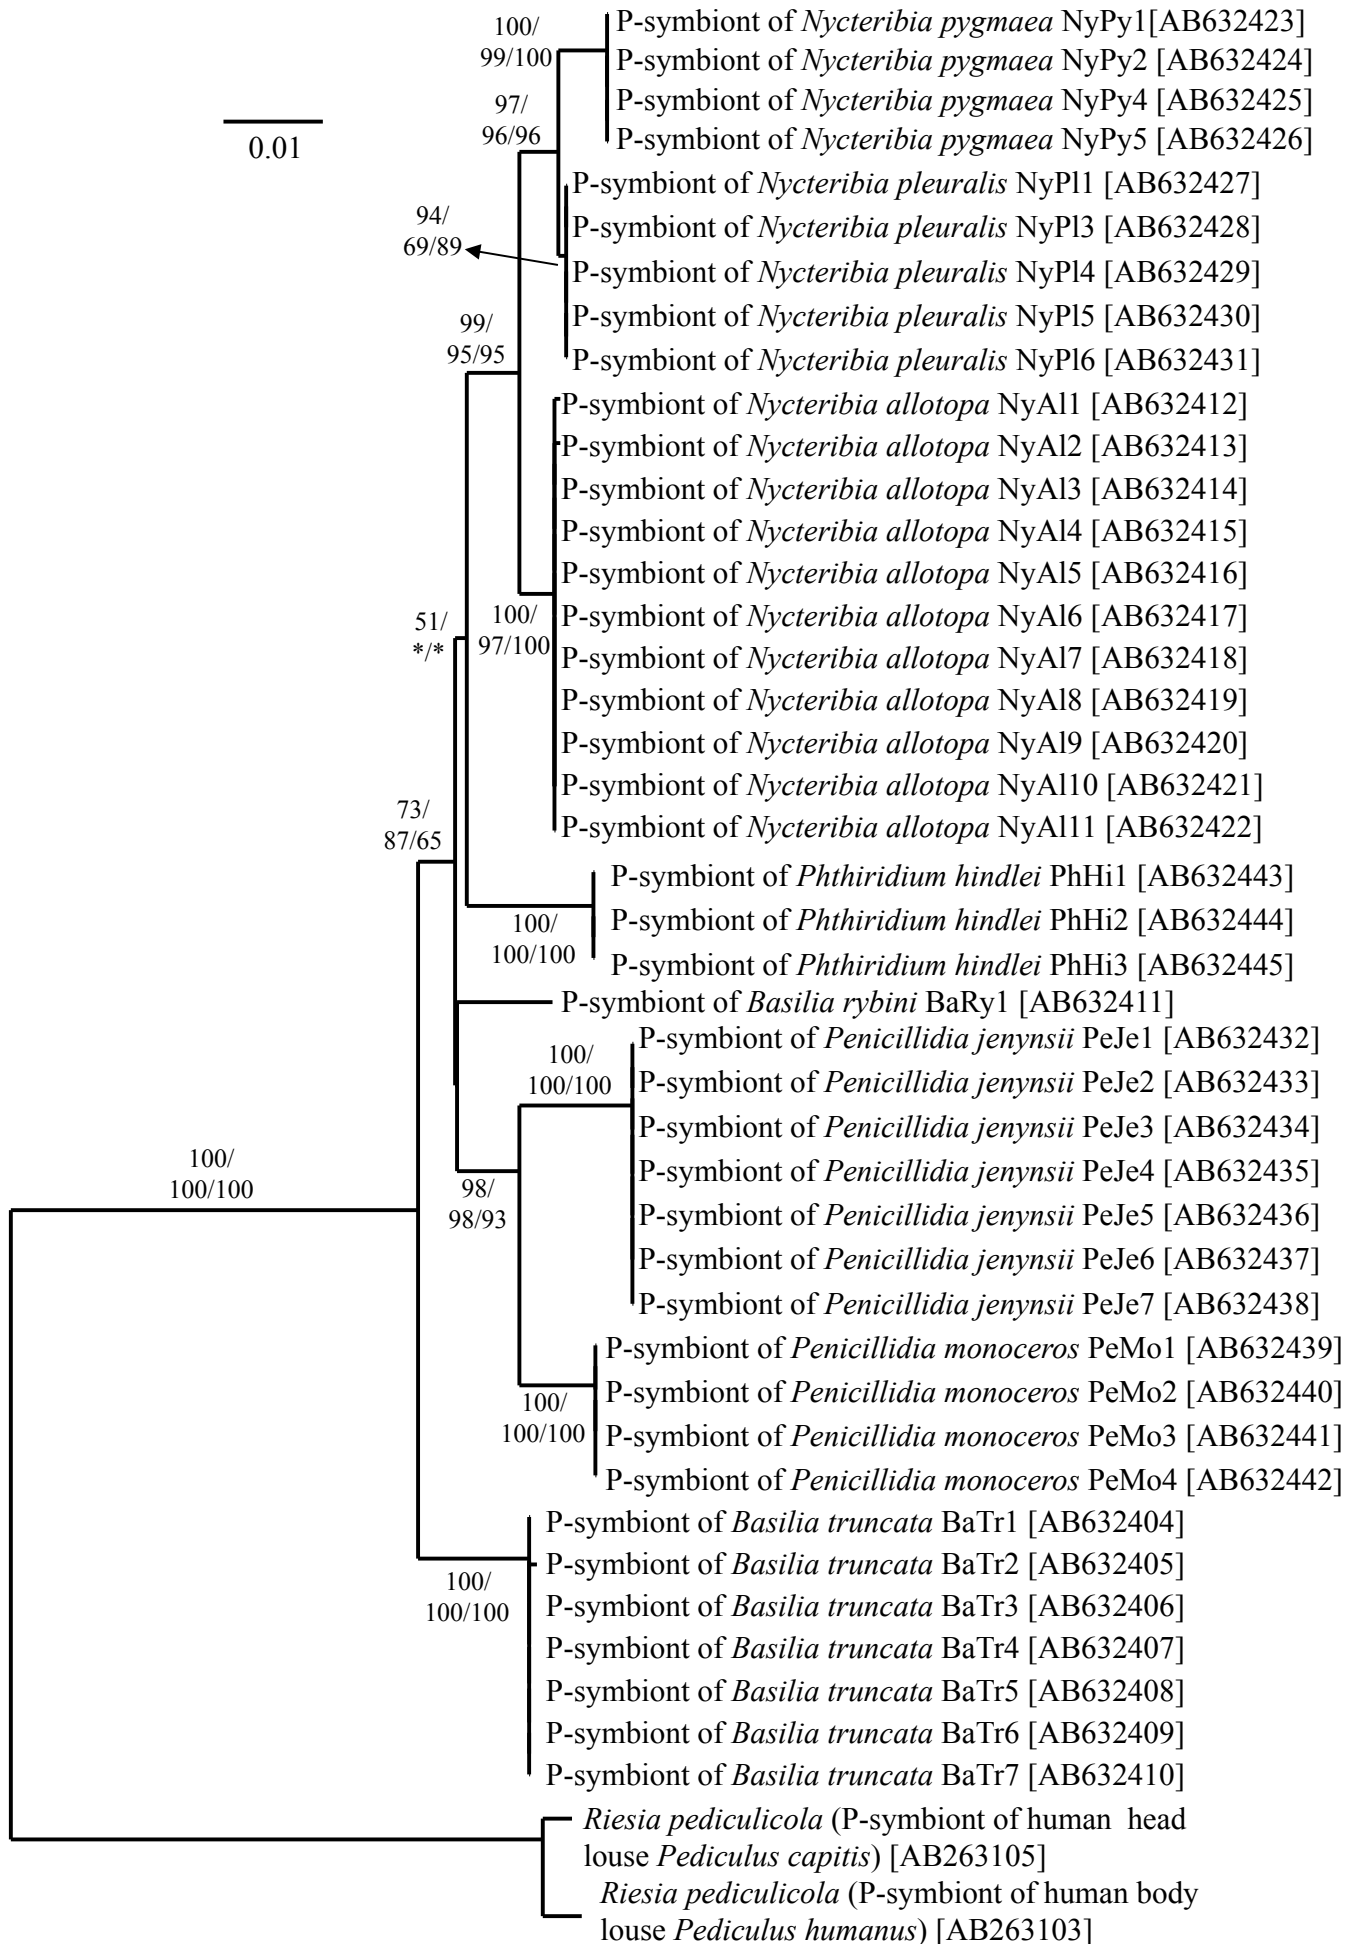

Supplementary Figure S3

Supplement: ismej2011125x4.pdf [file ismej2011125x4.pdf]

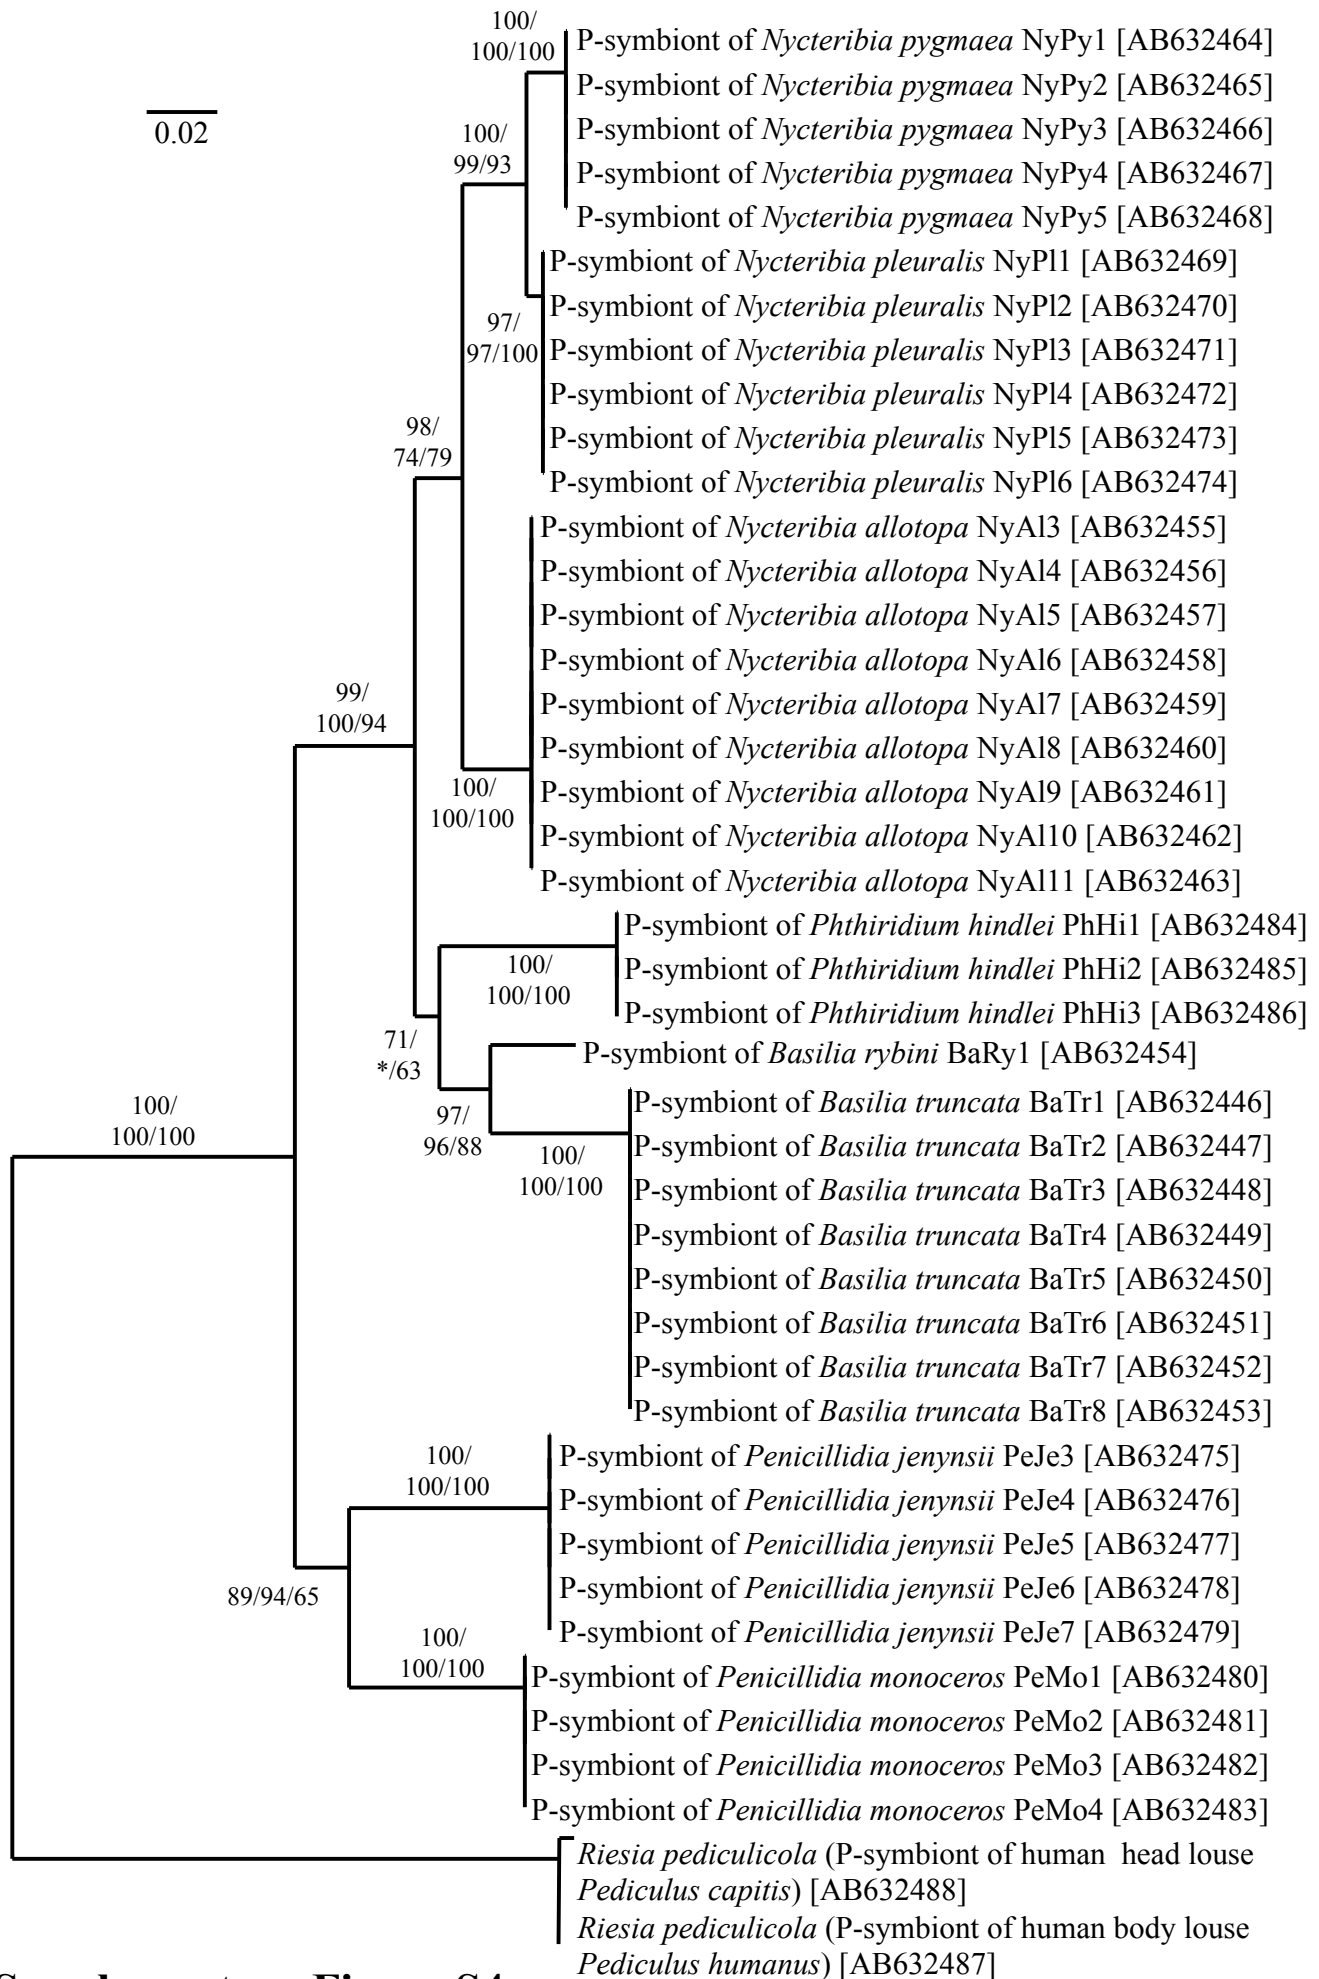

Supplementary Figure S4

Supplement: ismej2011125x5.pdf [file ismej2011125x5.pdf]

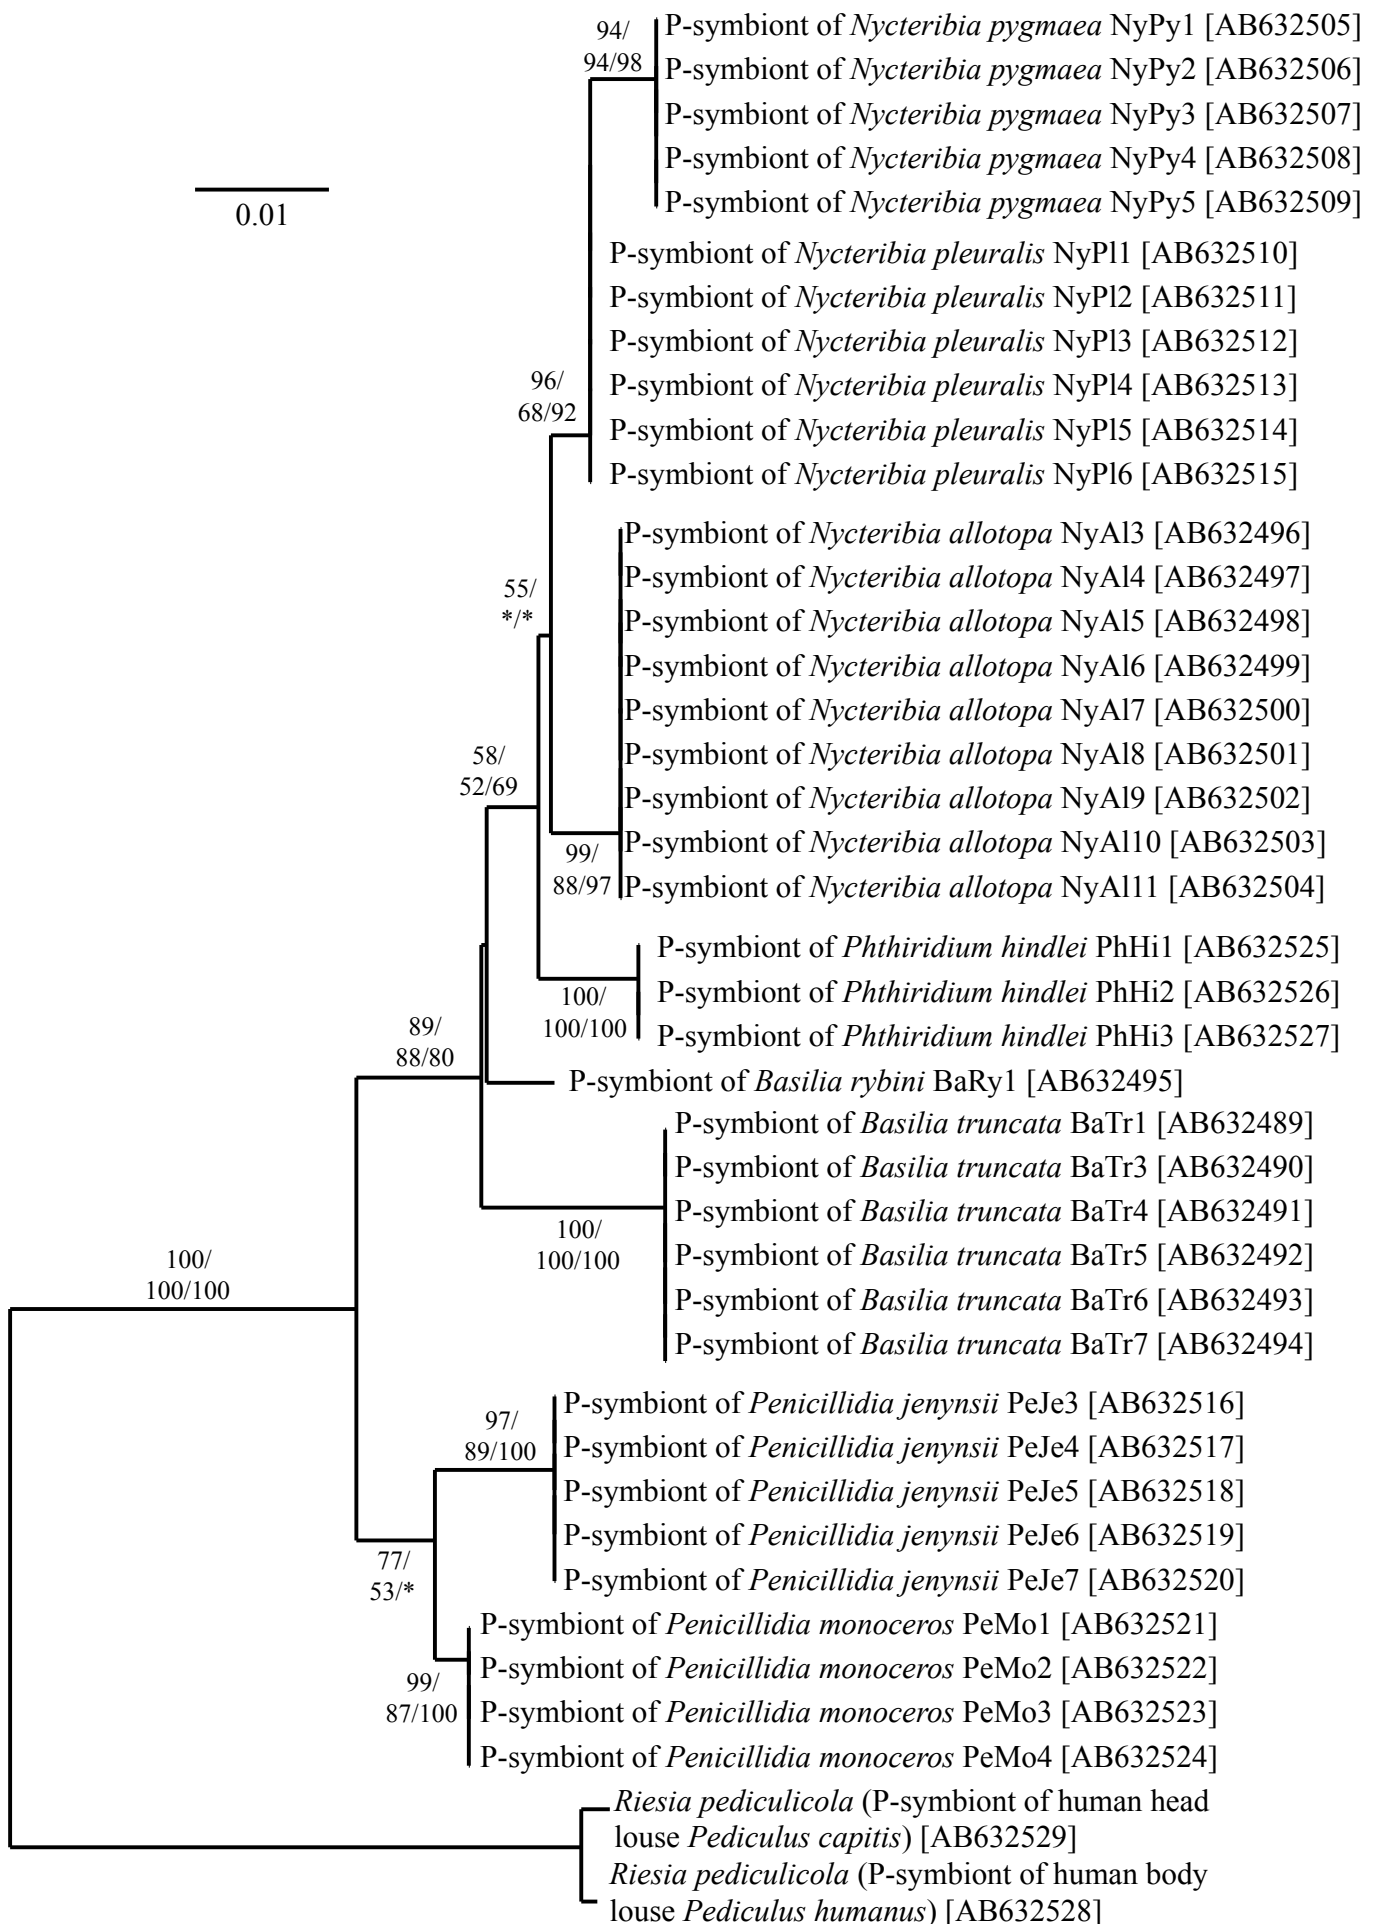

Supplementary Figure S5

Supplement: ismej2011125x6.pdf [file ismej2011125x6.pdf]

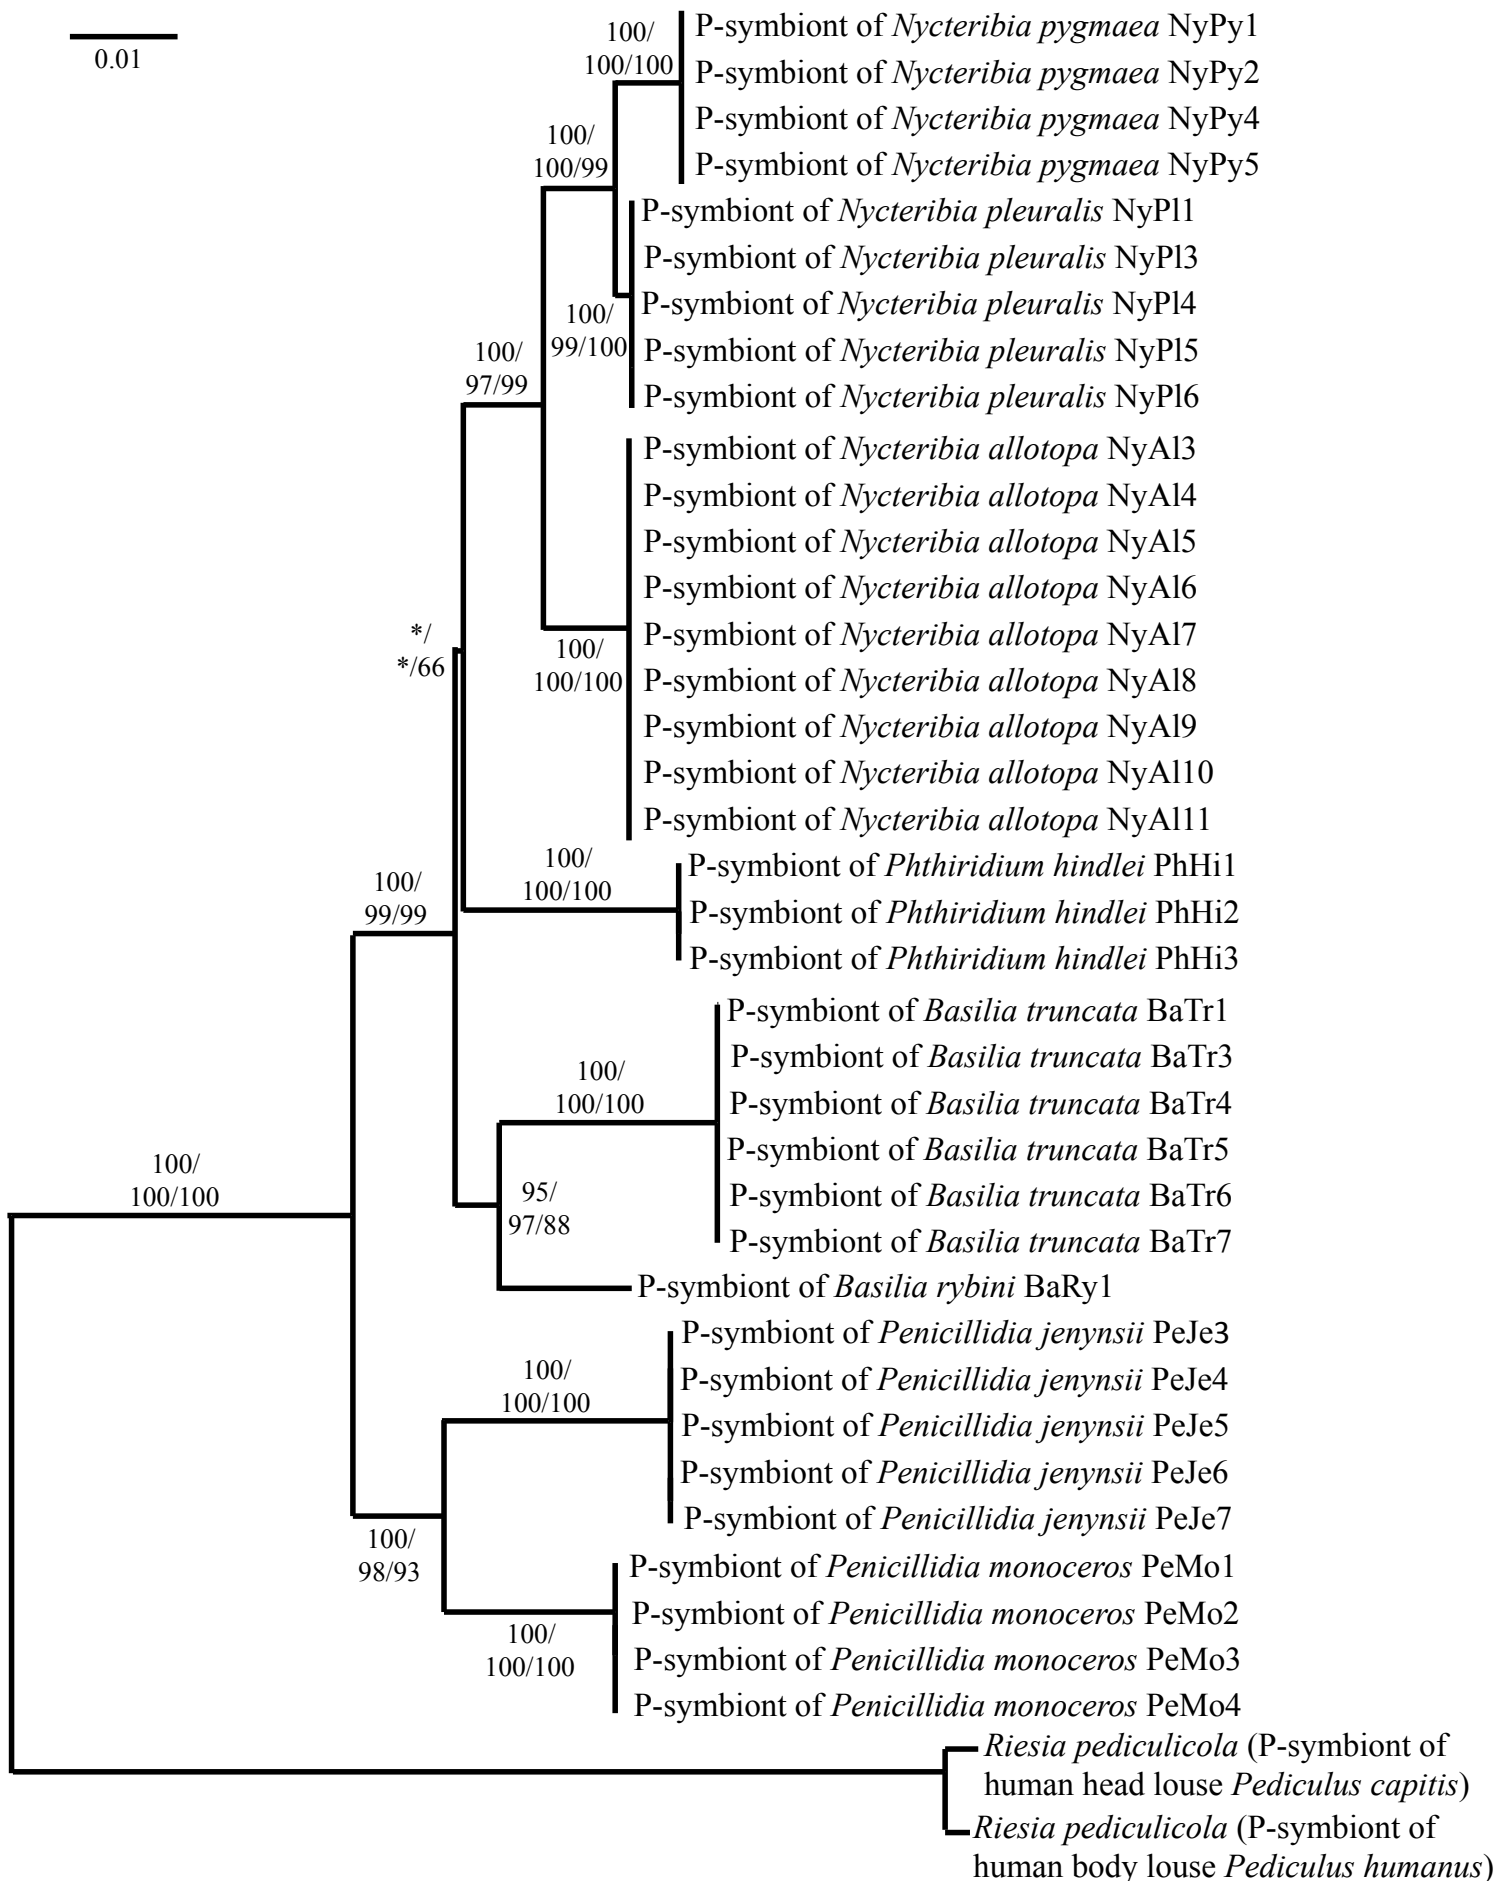

Supplementary Figure S6

Supplement: ismej2011125x7.pdf [file ismej2011125x7.pdf]

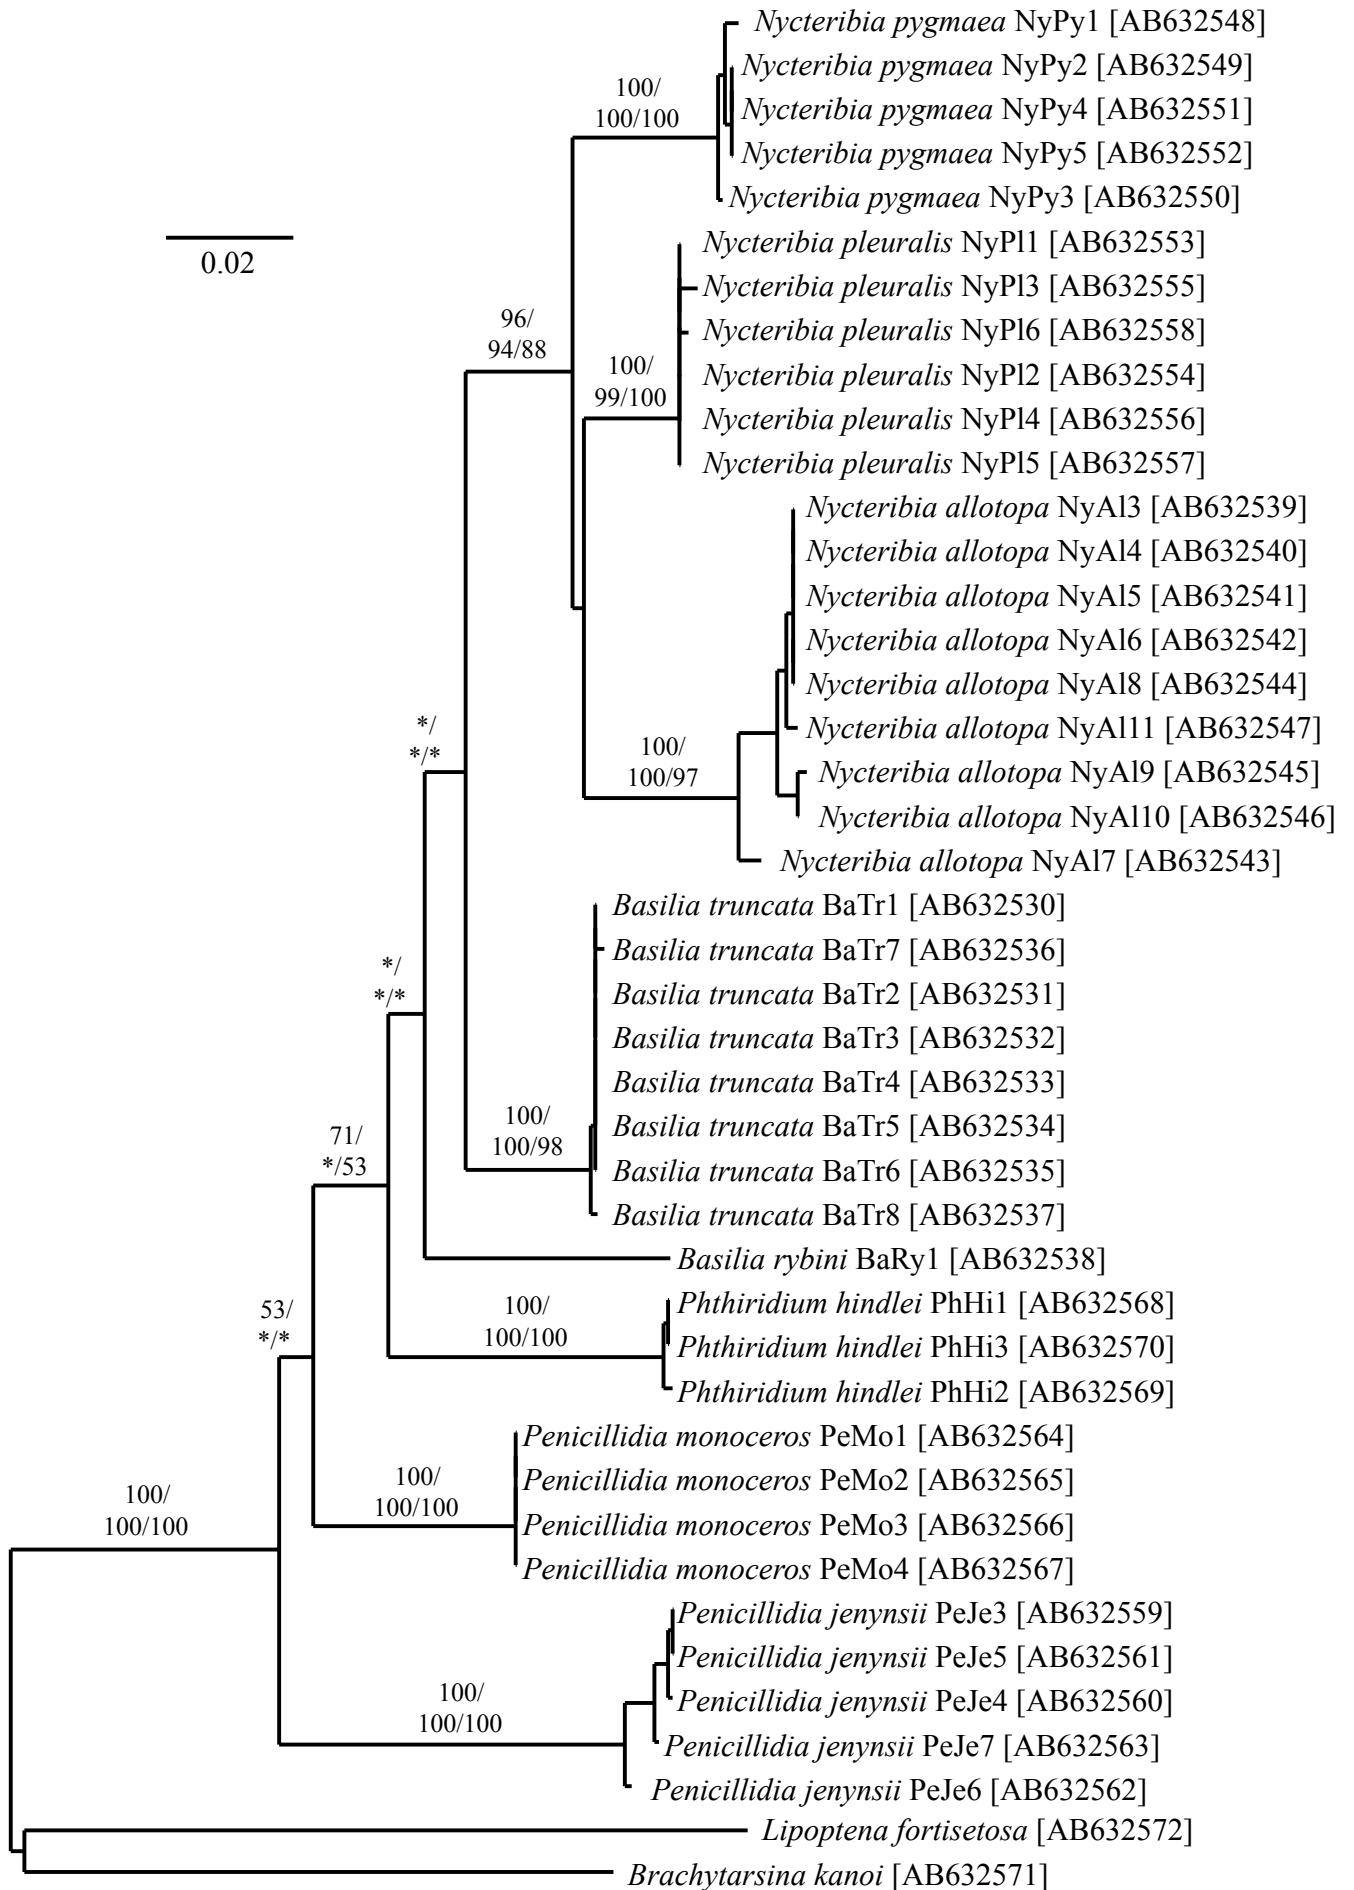

**Supplementary Figure S7**

Supplement: ismej2011125x8.pdf [file ismej2011125x8.pdf]

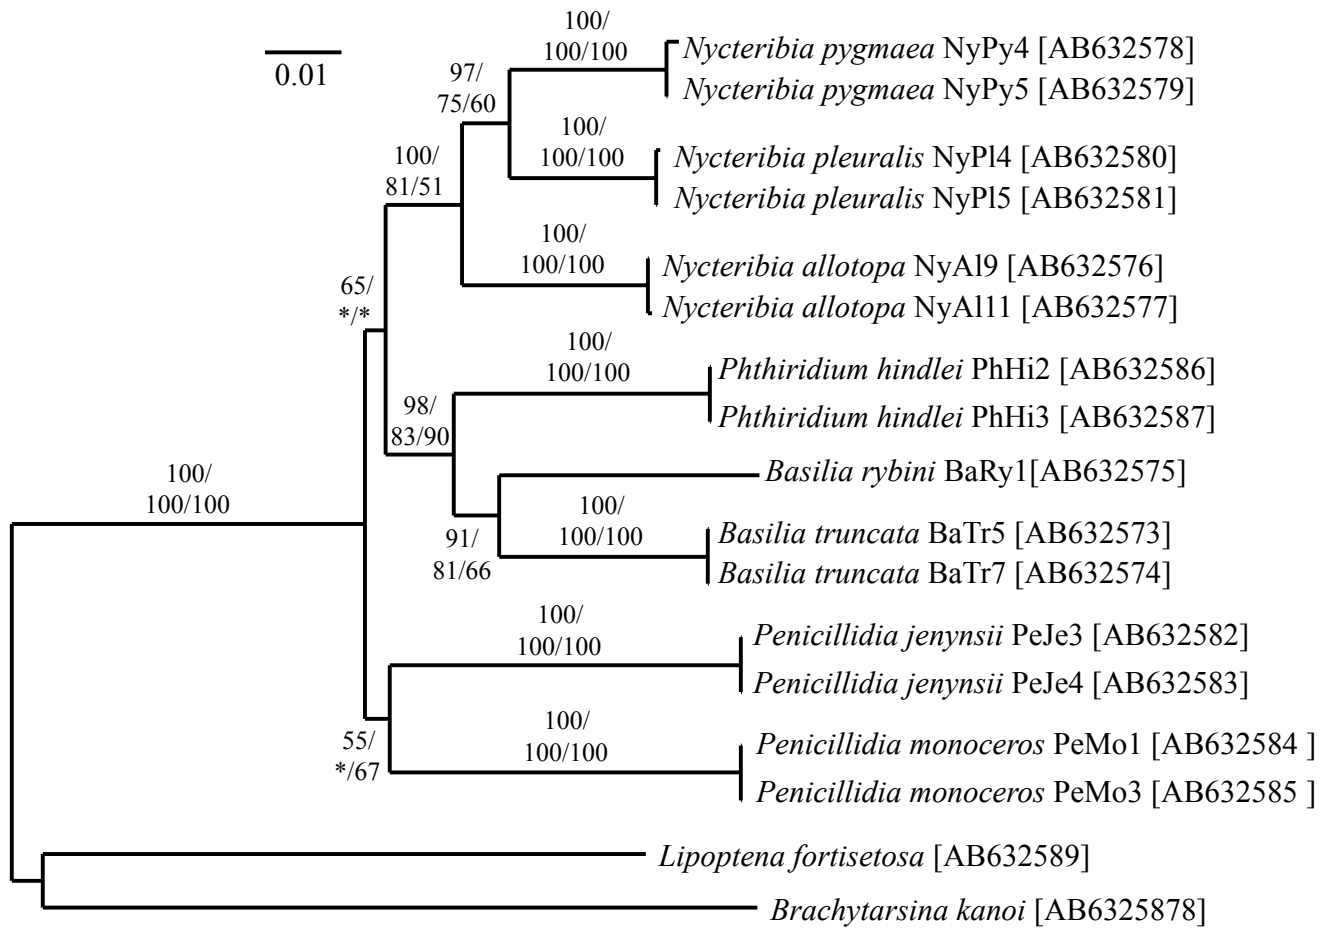

**Supplementary Figure S8**

Supplement: ismej2011125x9.pdf [file ismej2011125x9.pdf]
